# Supplementary material for: Precise control of TiO2 overlayer on hematite nanorod arrays by ALD for the photoelectrochemical water splitting
Source: Royal Society of Chemistry journal article supplement (doi:10.1039/d3se01633a), 2024-01-01
Supplement: d3se01633a1.pdf [file d3se01633a1.pdf]

## Supporting information

### **Precise control of TiO<sub>2</sub> overlayer on hematite nanorod arrays by ALD for the photoelectrochemical water splitting**

*Jiao Wang, Letizia Liccardo, Heydar Habibimarkani, Ewa Wierzbicka, Thorsten Schultz, Norbert Koch, Elisa Moretti\*, and Nicola Pinna\**

Jiao Wang, Nicola Pinna

Department of Chemistry and the Center for the Science of Materials Berlin, Brook-Taylor-Str. 2, 12489 Berlin, Germany

E-mail: nicola.pinna@hu-berlin.de

Letizia Liccardo, Heydar Habibimarkani, Elisa Moretti

Department of Molecular Sciences and Nanosystems, Ca' Foscari University of Venice, Via Torino 155, 30172 Venezia Mestre, Italy

Email: elisa.moretti@unive.it

Ewa Wierzbicka

Department of Functional Materials and Hydrogen Technology, Faculty of Advanced Technologies and Chemistry, Military University of Technology, 2 Kaliskiego Street, Warsaw 00908, Poland

Thorsten Schultz, Norbert Koch

Institut für Physik and IRIS Adlershof, Humboldt-Universität zu Berlin, Brook-Taylor-Str. 6, 12489 Berlin, Germany

Thorsten Schultz, Norbert Koch

Helmholtz-Zentrum Berlin für Materialien und Energie GmbH, Hahn-Meitner-Platz 1, 14109 Berlin, Germany

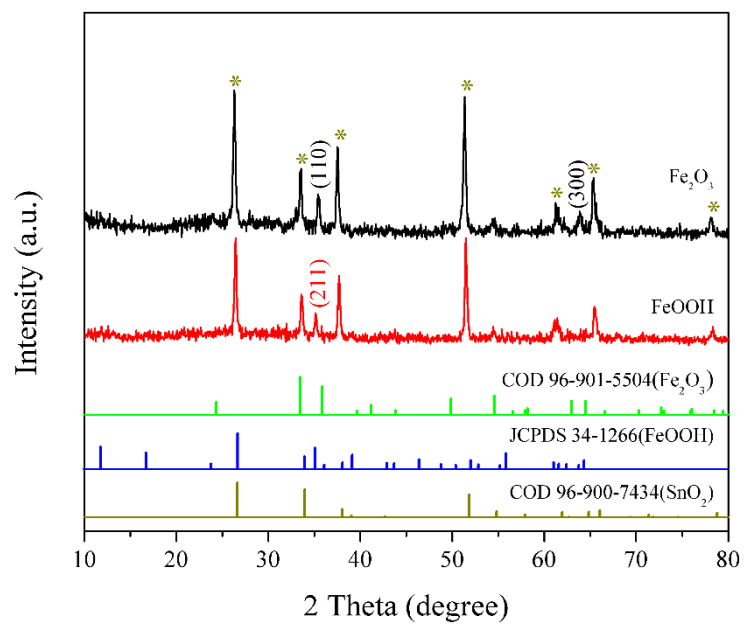

**Figure S1.** XRD patterns of pristine  $\beta$ -FeOOH and  $\alpha$ -Fe<sub>2</sub>O<sub>3</sub>.

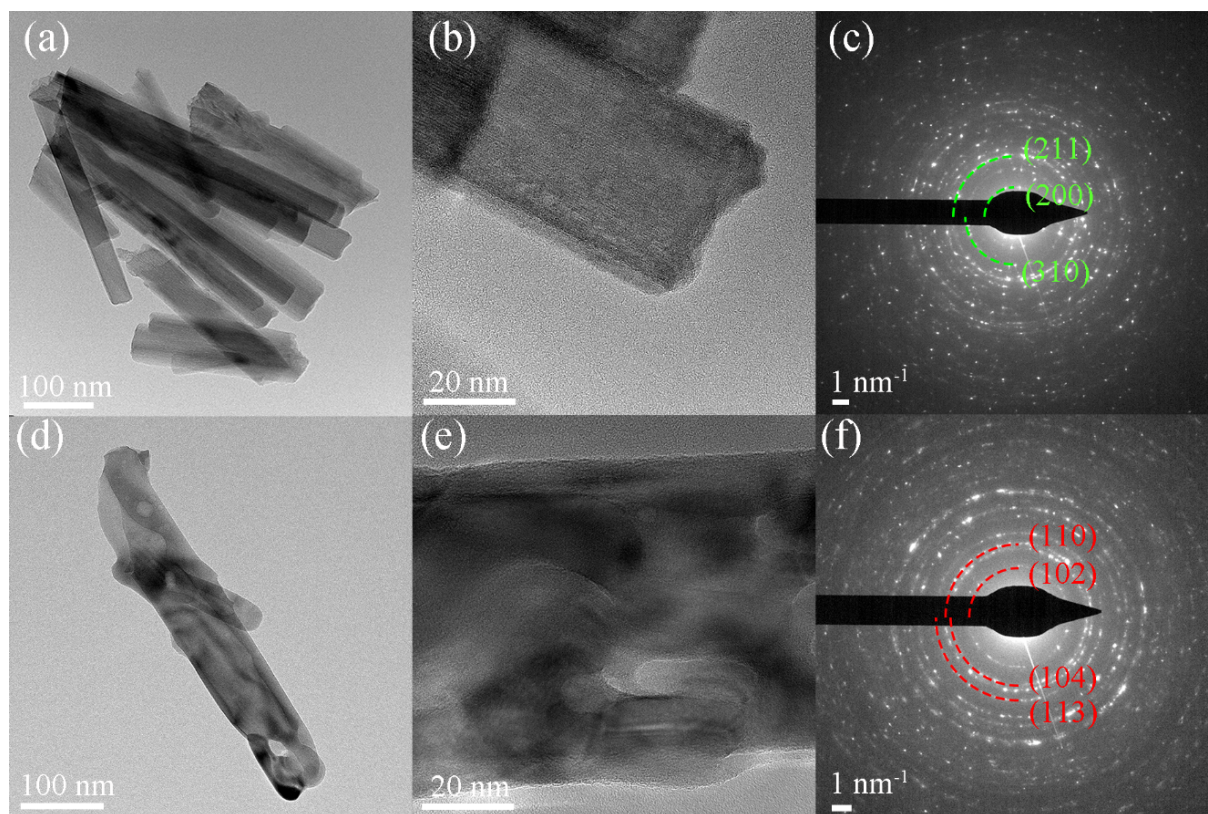

**Figure S2.** (a,b) TEM images of  $\beta$ -FeOOH nanorods. (c) Corresponding SAED pattern of  $\beta$ -FeOOH nanorods. (d,e) HRTEM images of  $\alpha$ -Fe<sub>2</sub>O<sub>3</sub> nanorods. (f) Corresponding SAED pattern of  $\alpha$ -Fe<sub>2</sub>O<sub>3</sub> nanorods.

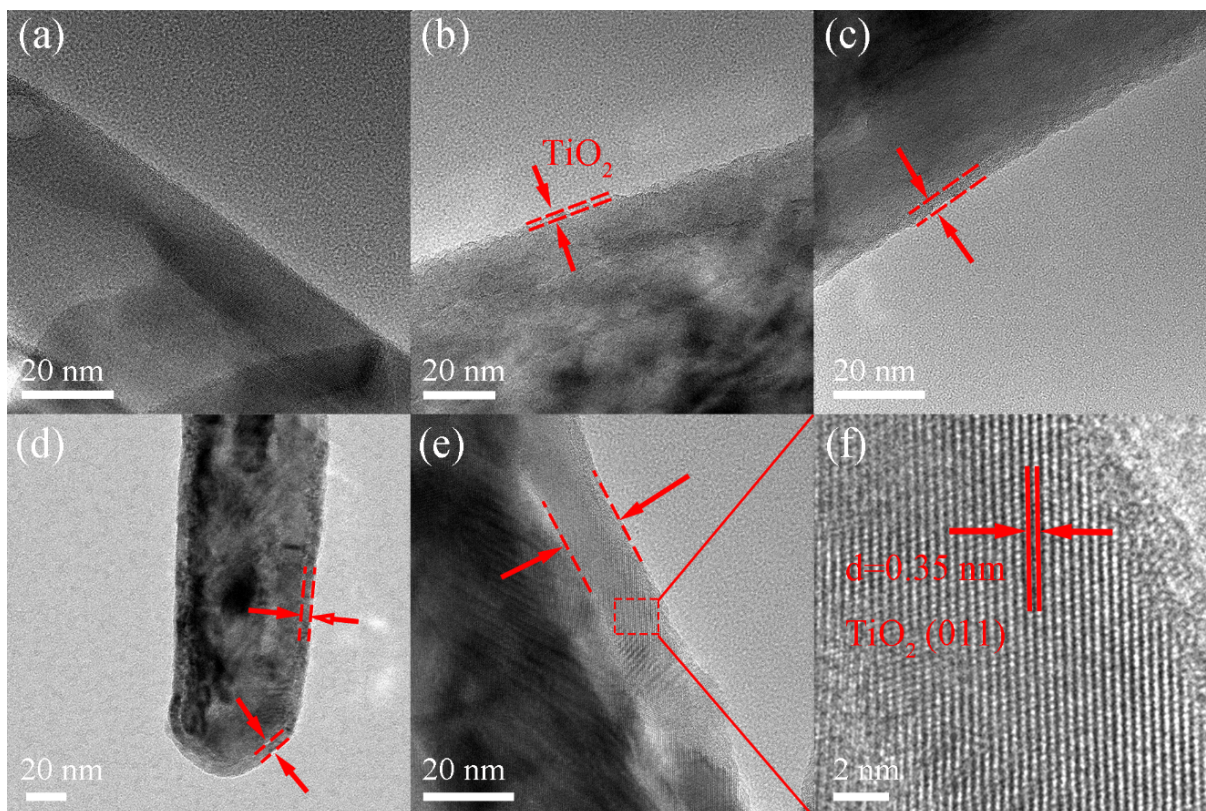

**Figure S3.** HRTEM images of TiO<sub>2</sub> deposited on pristine hematite with different ALD cycles: (a) TiO<sub>2</sub>-10/Fe<sub>2</sub>O<sub>3</sub>, (b) TiO<sub>2</sub>-20/Fe<sub>2</sub>O<sub>3</sub>, (c) TiO<sub>2</sub>-40/Fe<sub>2</sub>O<sub>3</sub>, (d) TiO<sub>2</sub>-80/Fe<sub>2</sub>O<sub>3</sub>, (e) TiO<sub>2</sub>-150/Fe<sub>2</sub>O<sub>3</sub>, (f) The magnified view of the lattice fringes of TiO<sub>2</sub>-150/Fe<sub>2</sub>O<sub>3</sub>.

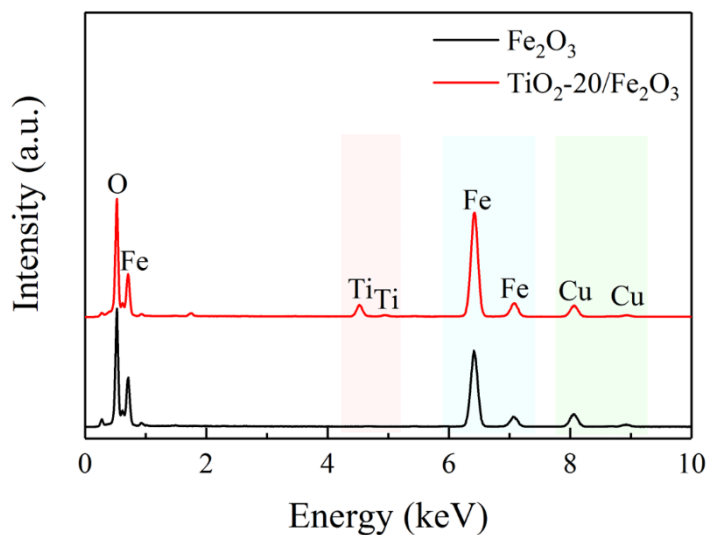

**Figure S4.** EDX spectra for pristine Fe<sub>2</sub>O<sub>3</sub> and TiO<sub>2</sub>-20/Fe<sub>2</sub>O<sub>3</sub> analyzed on a copper TEM grid.

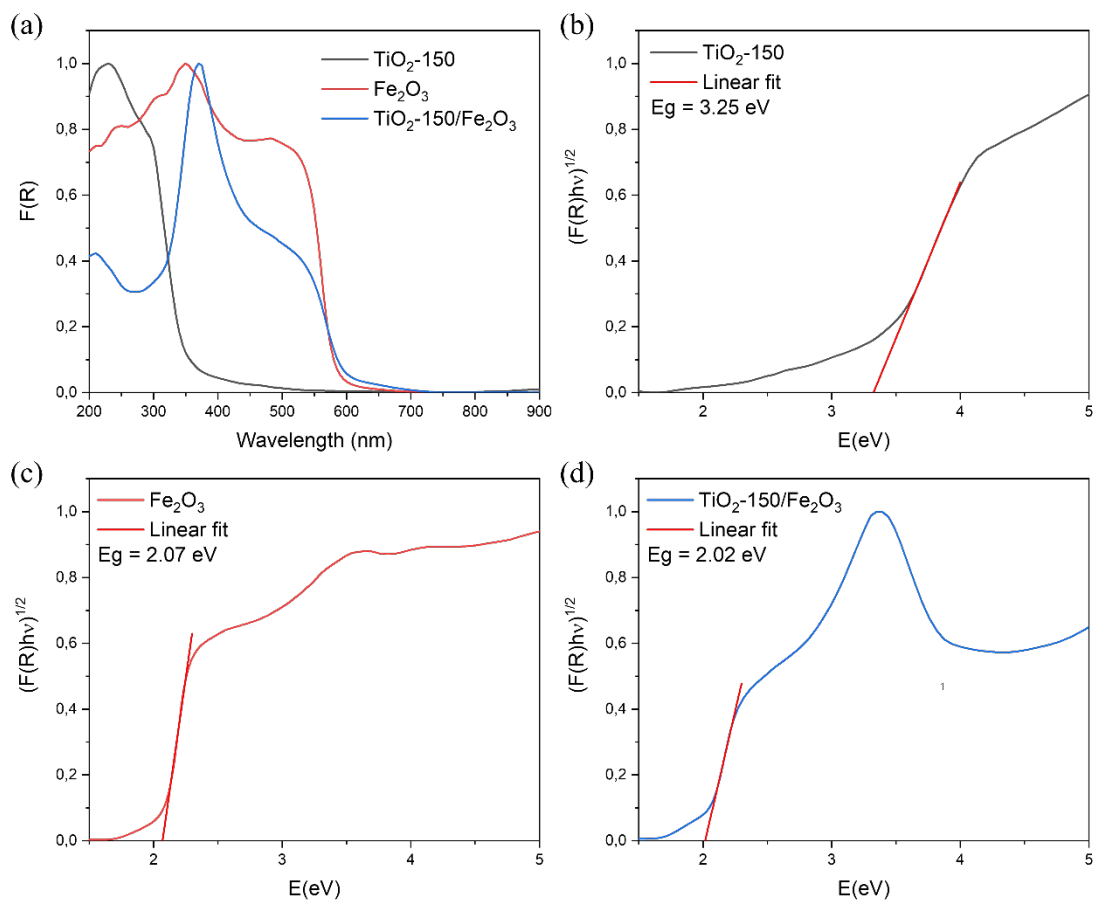

**Figure S5.** (a) Plots of  $F(R)$  versus wavelength of the pristine Fe<sub>2</sub>O<sub>3</sub>, pristine TiO<sub>2</sub> and TiO<sub>2</sub>/Fe<sub>2</sub>O<sub>3</sub> nanocomposites from the UV-vis diffuse reflectance spectra. Plots of  $(F(R)h\nu)^{1/2}$  versus photon energy for the (b) pristine TiO<sub>2</sub> (c) pristine Fe<sub>2</sub>O<sub>3</sub> and (d) TiO<sub>2</sub>/Fe<sub>2</sub>O<sub>3</sub> heterojunction.

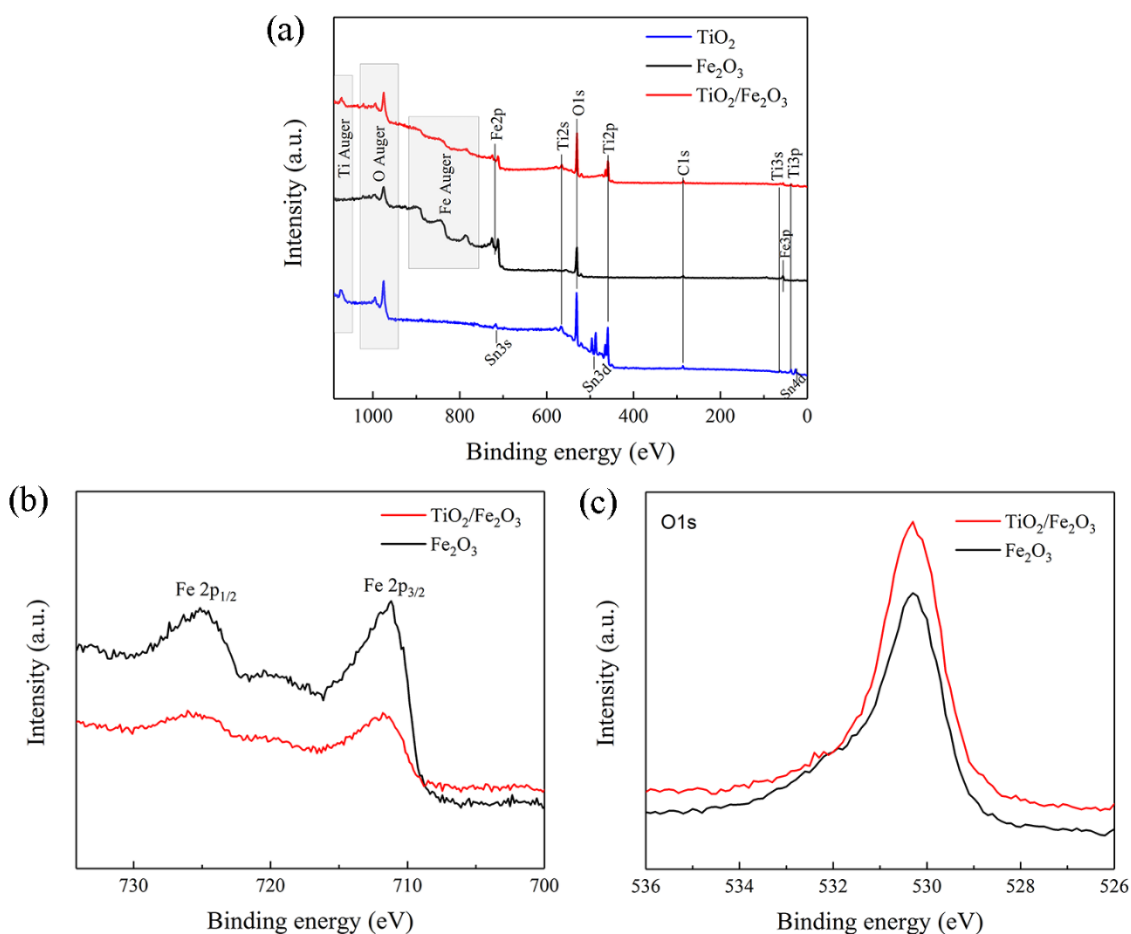

**Figure S6.** (a) XPS survey spectra of the pristine Fe<sub>2</sub>O<sub>3</sub>, pristine TiO<sub>2</sub> with 20ALD cycles and Fe<sub>2</sub>O<sub>3</sub> coated with 20 ALD cycles of TiO<sub>2</sub> overlayer. For the TiO<sub>2</sub> sample, the tin signal from the FTO substrate is visible due to the small thickness of the TiO<sub>2</sub> layer. (b) High-resolution Fe2p photoelectron spectrum of the pristine Fe<sub>2</sub>O<sub>3</sub> and TiO<sub>2</sub>-20/Fe<sub>2</sub>O<sub>3</sub>. (c) High-resolution O1s photoelectron spectrum of pristine Fe<sub>2</sub>O<sub>3</sub> and TiO<sub>2</sub>-20/Fe<sub>2</sub>O<sub>3</sub>.

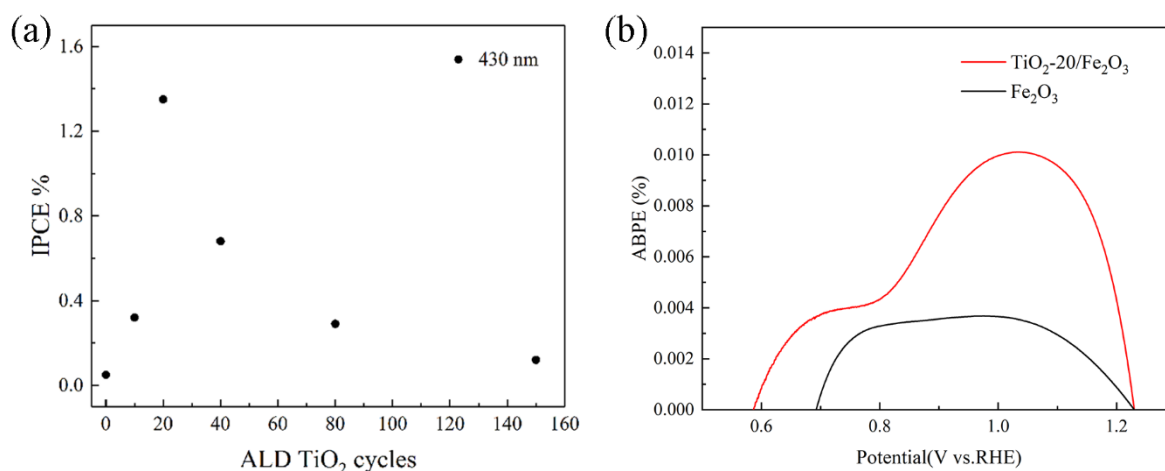

**Figure S7.** (a) IPCE spectra of pristine Fe<sub>2</sub>O<sub>3</sub> and TiO<sub>2</sub>/Fe<sub>2</sub>O<sub>3</sub> photoanodes measured in 1M KOH at 0.5 V bias vs. Hg/HgO under 430 nm light irradiation. (b) ABPE of pristine Fe<sub>2</sub>O<sub>3</sub> and TiO<sub>2</sub>-20/Fe<sub>2</sub>O<sub>3</sub> photoanodes.



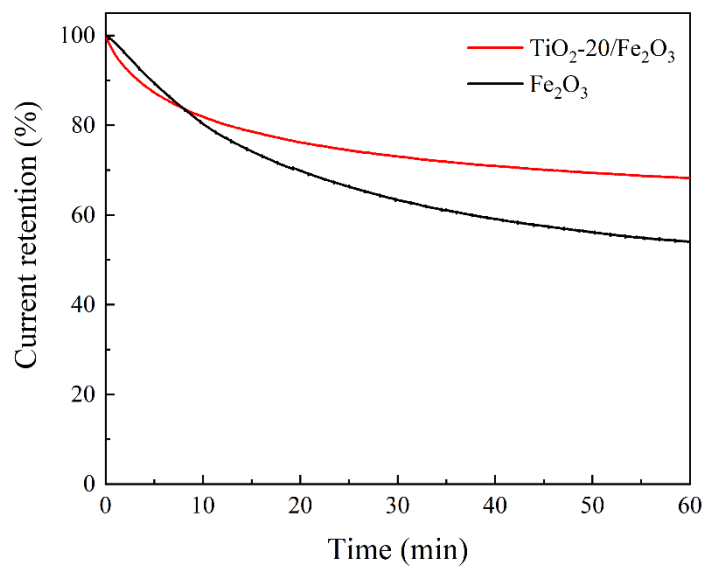

**Figure S8.** Stability test of pristine Fe<sub>2</sub>O<sub>3</sub> and TiO<sub>2</sub>-20/Fe<sub>2</sub>O<sub>3</sub> photoanodes.

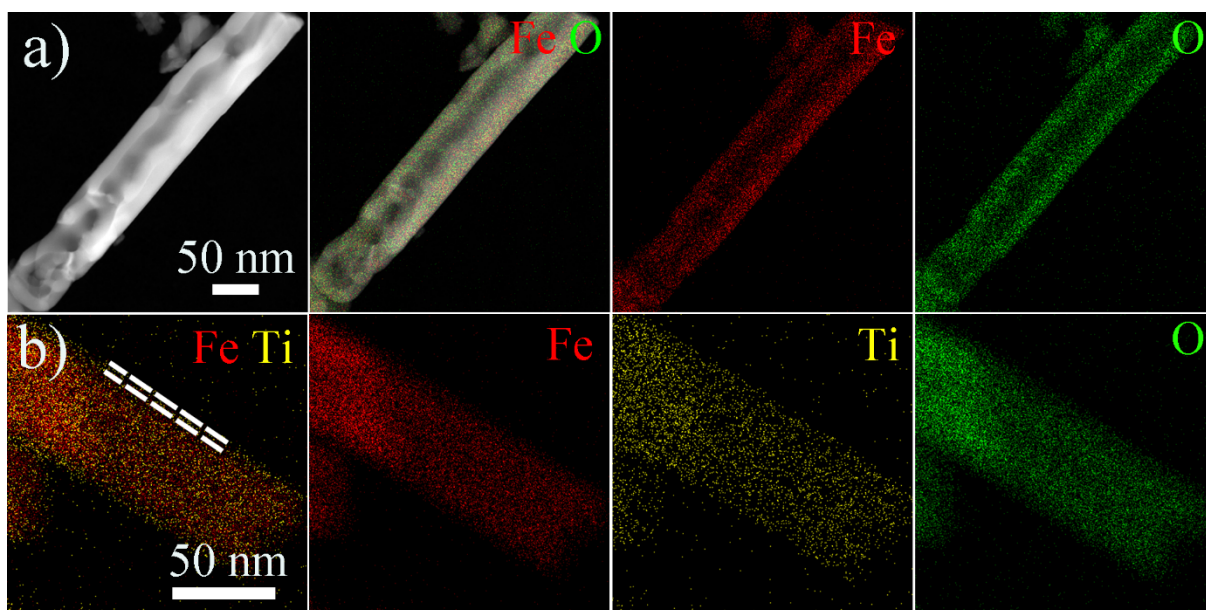

**Figure S9.** The morphology of the synthesized photocatalyst after stability test: a) pristine Fe<sub>2</sub>O<sub>3</sub>, b) TiO<sub>2</sub>-20/Fe<sub>2</sub>O<sub>3</sub>.

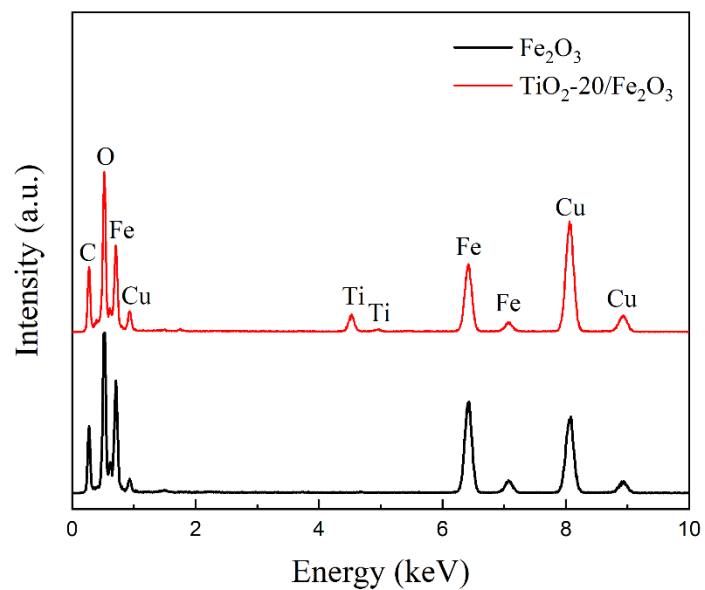

**Figure S10.** The composition of the pristine Fe<sub>2</sub>O<sub>3</sub> and TiO<sub>2</sub>-20/Fe<sub>2</sub>O<sub>3</sub> after stability test.

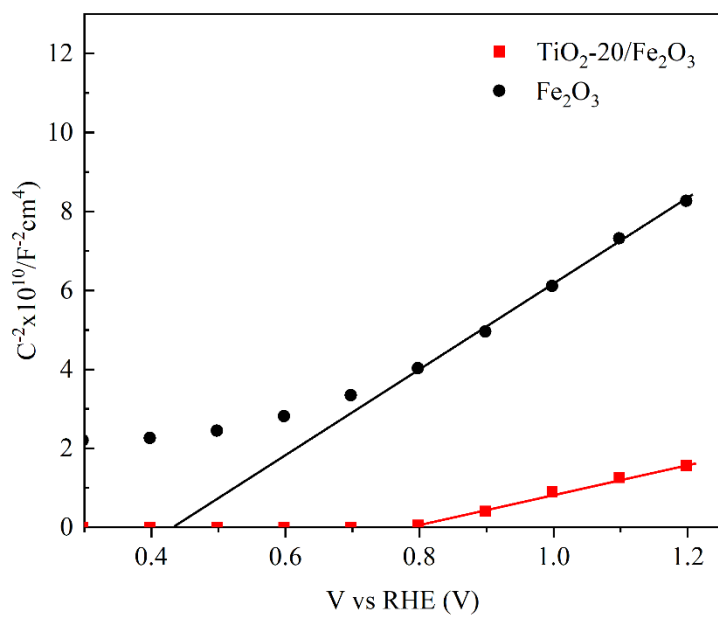

**Figure S11.** Mott-Schottky plots of pristine Fe<sub>2</sub>O<sub>3</sub> and TiO<sub>2</sub>-20/Fe<sub>2</sub>O<sub>3</sub> heterostructure.

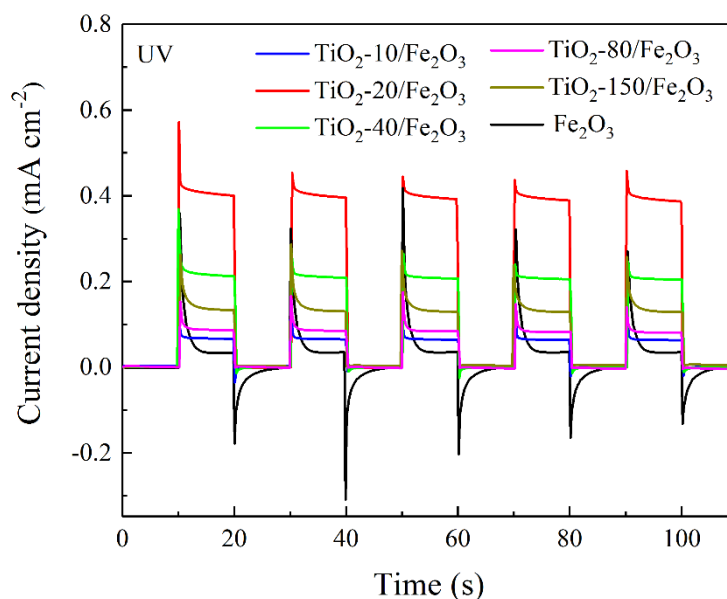

**Figure S12.** Time-based photocurrent density for pristine and TiO<sub>2</sub>-coated hematite photoanodes at 0.5 V bias vs. Hg/HgO under UV light irradiation.

**Table S1.** Average TiO<sub>2</sub> overlayer thickness and the GPC calculated from TEM micrographs and spectroscopic ellipsometry.

| Samples                                              | Transmission electron microscopy |                         | Spectroscopic ellipsometry |                         |
|------------------------------------------------------|----------------------------------|-------------------------|----------------------------|-------------------------|
|                                                      | Thickness (nm)                   | Slope of line fit (GPC) | Thickness (nm)             | Slope of line fit (GPC) |
| TiO <sub>2</sub> -10/Fe <sub>2</sub> O <sub>3</sub>  | ---                              |                         | 2.2                        |                         |
| TiO <sub>2</sub> -20/Fe <sub>2</sub> O <sub>3</sub>  | 1.7                              |                         | 3.5                        |                         |
| TiO <sub>2</sub> -40/Fe <sub>2</sub> O <sub>3</sub>  | 3.5                              | 0.88 Å                  | 5.0                        | 0.96 Å                  |
| TiO <sub>2</sub> -80/Fe <sub>2</sub> O <sub>3</sub>  | 6.8                              |                         | 9.0                        |                         |
| TiO <sub>2</sub> -150/Fe <sub>2</sub> O <sub>3</sub> | 13.2                             |                         | 15.1                       |                         |

**Table S2.** The atomic/weight percentage of all the samples with different ALD cycles.

| Samples                                              | Atom fraction (%) |      | Mass fraction (%) |      |
|------------------------------------------------------|-------------------|------|-------------------|------|
|                                                      | Ti                | Fe   | Ti                | Fe   |
| TiO <sub>2</sub> -10/Fe <sub>2</sub> O <sub>3</sub>  | 1.28              | 28.2 | 2.21              | 57.0 |
| TiO <sub>2</sub> -20/Fe <sub>2</sub> O <sub>3</sub>  | 3.89              | 39.9 | 5.62              | 67.2 |
| TiO <sub>2</sub> -40/Fe <sub>2</sub> O <sub>3</sub>  | 6.59              | 24.7 | 11.3              | 49.3 |
| TiO <sub>2</sub> -80/Fe <sub>2</sub> O <sub>3</sub>  | 9.88              | 22.1 | 16.9              | 44.1 |
| TiO <sub>2</sub> -150/Fe <sub>2</sub> O <sub>3</sub> | 18.4              | 22.7 | 28.5              | 41.0 |
